# Supplementary material for: Effectiveness of Sports Nutrition Education Based on Self-Determination Theory for Male University Rowing Athletes: A Randomized Controlled Trial
Source: MDPI journal article supplement (doi:10.3390/nu16060799), 2024-03-11
Supplement: s1 [file s1]

## Supplementary Material

**Table S1.** Program Overview.

|                        |           | Before                                                                        | Implementation period |      |      |      |     |              |      |      |     |            |      |      | Immediately<br>after | Continued<br>Evaluation |     |      |
|------------------------|-----------|-------------------------------------------------------------------------------|-----------------------|------|------|------|-----|--------------|------|------|-----|------------|------|------|----------------------|-------------------------|-----|------|
| MONTH                  |           |                                                                               | 1st                   |      |      |      | 2nd |              |      |      | 3rd |            |      |      |                      | 4th                     | 5th | 6th  |
| DAY                    |           |                                                                               | 5/30                  | 6/13 | 6/20 | 6/27 | 7/4 | 7/10<br>7/11 | 7/18 | 7/25 | 8/1 | 8/7<br>8/8 | 8/15 | 8/22 |                      | 8/29                    | 9/4 | 10/2 |
| WEEK                   |           | -2                                                                            | 0                     | 1    | 2    | 3    | 4   | 5            | 6    | 7    | 8   | 9          | 10   | 11   | 12                   | 16                      | 20  | 24   |
| Program Flow           | SDT group | Seminar (60 minutes)                                                          | ✓                     |      |      |      | ✓   |              |      |      | ✓   |            |      |      |                      |                         |     |      |
|                        |           | + worksheet (30 minutes)                                                      | ✓                     |      |      |      | ✓   |              |      |      | ✓   |            |      |      |                      |                         |     |      |
|                        |           | Share meal photos and your issues<br>(Online Communication Tools)             | ✓                     | ✓    | ✓    | ✓    | ✓   | ✓            | ✓    | ✓    | ✓   | ✓          | ✓    | ✓    | ✓                    |                         |     |      |
|                        |           | + follow-up (mail)                                                            | ✓                     | ✓    | ✓    | ✓    | ✓   | ✓            | ✓    | ✓    | ✓   | ✓          | ✓    | ✓    | ✓                    |                         |     |      |
|                        | COT group | Seminar (60 minutes)                                                          | ✓                     |      |      |      | ✓   |              |      |      | ✓   |            |      |      |                      |                         |     |      |
|                        |           | Free, contact dietitian if you have questions<br>(Online Communication Tools) | ✓                     | ✓    | ✓    | ✓    | ✓   | ✓            | ✓    | ✓    | ✓   | ✓          | ✓    | ✓    | ✓                    |                         |     |      |
| Survey and measurement |           | Research Description and Consent Form                                         | ✓                     |      |      |      |     |              |      |      |     |            |      |      |                      |                         |     |      |
|                        | 1         | Anthropometric measurements<br>(Height, weight, body fat percentage)          | ✓                     |      |      | ✓    |     |              |      | ✓    |     |            | ✓    |      | ✓                    | ✓                       | ✓   | ✓    |
|                        | 2         | Sports Nutrition Knowledge (SNK)                                              | ✓                     |      |      |      |     |              |      |      |     |            |      |      | ✓                    |                         |     | ✓    |
|                        | 3         | Treatment self-regulation questionnaire (TSRQ)                                | ✓                     |      |      |      |     |              |      |      |     |            |      |      | ✓                    | ✓                       | ✓   | ✓    |
|                        | 4         | Brief-type self-administered diet history<br>questionnaire (BDHQ)             | ✓                     |      |      |      |     |              |      |      |     |            |      |      | ✓                    |                         |     | ✓    |

SDT group: Self-Determination Theory group COT group: Control group

**Table S2.** Between-group differences in anthropometric measurements, SNK and TSRQ.

|                                           | Self-Determination Theory group ( <i>n</i> = 14) |                   |                    | Control group ( <i>n</i> = 17) |                   |                    | <i>p</i> value <sup>†</sup> |
|-------------------------------------------|--------------------------------------------------|-------------------|--------------------|--------------------------------|-------------------|--------------------|-----------------------------|
|                                           | Before                                           | Immediately after | After three months | Before                         | Immediately after | After three months |                             |
|                                           | mean value±SD                                    | mean value±SD     | mean value±SD      | mean value±SD                  | mean value±SD     | mean value±SD      |                             |
| <b>Anthropometric measurements</b>        |                                                  |                   |                    |                                |                   |                    |                             |
| Age (yrs)                                 | 19.6 ± 1.5                                       | 19.9 ± 1.6        | 19.9 ± 1.6         | 19.6 ± 1.3                     | 19.9 ± 1.5        | 19.9 ± 1.5         | 0.973                       |
| Height (cm)                               | 173.9 ± 4.8                                      | 173.9 ± 4.8       | 173.9 ± 4.9        | 173.1 ± 5.6                    | 172.9 ± 5.5       | 172.8 ± 5.7        | 0.682                       |
| Weight (kg)                               | 72.0 ± 7.9                                       | 71.5 ± 6.2        | 72.4 ± 6.0         | 68.3 ± 6.2                     | 69.2 ± 6.3        | 69.6 ± 5.4         | 0.152                       |
| Body fat (%)                              | 14.6 ± 4.1                                       | 14.3 ± 3.9        | 14.4 ± 3.0         | 14.0 ± 4.3                     | 12.7 ± 3.9        | 13.3 ± 3.4         | 0.712                       |
| Lean body mass (kg)                       | 61.4 ± 5.7                                       | 61.2 ± 5.6        | 62.0 ± 5.6         | 58.8 ± 7.1                     | 60.4 ± 5.8        | 60.3 ± 4.8         | 0.290                       |
| Lean body mass/m (kg)                     | 35.3 ± 2.8                                       | 35.2 ± 2.7        | 35.6 ± 2.5         | 33.9 ± 3.4                     | 34.9 ± 2.5        | 34.8 ± 2.0         | 0.251                       |
| <b>SNK</b>                                |                                                  |                   |                    |                                |                   |                    |                             |
| Total SNK score (%)                       | 78.6 ± 12.5                                      | 87.2 ± 7.5        | 87.2 ± 8.0         | 75.6 ± 10.1                    | 83.6 ± 8.3        | 79.0 ± 15.9        | 0.475                       |
| Energy and refueling (%)                  | 84.5 ± 12.2                                      | 90.5 ± 12.6       | 91.7 ± 10.8        | 77.5 ± 19.5                    | 86.3 ± 14.7       | 81.4 ± 17.6        | 0.228                       |
| Hydration (%)                             | 100.0 ± 0.0                                      | 100.0 ± 0.0       | 100.0 ± 0.0        | 100.0 ± 0.0                    | 100.0 ± 0.0       | 94.1 ± 16.6        | —                           |
| Supplements (%)                           | 81.0 ± 25.2                                      | 81.0 ± 17.1       | 76.2 ± 15.6        | 74.5 ± 30.1                    | 78.4 ± 23.4       | 74.5 ± 25.1        | 0.529                       |
| Protein (%)                               | 50.0 ± 28.5                                      | 78.6 ± 28.1       | 81.0 ± 21.5        | 56.9 ± 22.9                    | 72.5 ± 27.0       | 68.6 ± 24.9        | 0.463                       |
| <b>TSRQ</b>                               |                                                  |                   |                    |                                |                   |                    |                             |
| Autonomous motivation subscale            | 5.05 ± 0.96                                      | 5.48 ± 0.93       | 5.44 ± 1.09        | 5.29 ± 1.34                    | 5.49 ± 0.99       | 5.40 ± 1.06        | 0.568                       |
| Externally controlled motivation subscale | 3.07 ± 1.07                                      | 2.81 ± 1.12       | 3.27 ± 1.34        | 2.92 ± 1.12                    | 3.23 ± 0.92       | 3.70 ± 1.34        | 0.708                       |
| Nonmotivation subscale                    | 2.74 ± 1.10                                      | 2.67 ± 0.93       | 3.14 ± 1.25        | 3.08 ± 1.48                    | 3.18 ± 1.22       | 3.12 ± 1.41        | 0.482                       |
| Relative Autonomous Motivation Index      | 1.98 ± 1.62                                      | 2.67 ± 1.64       | 2.17 ± 1.93        | 2.37 ± 1.53                    | 2.26 ± 1.19       | 1.71 ± 1.89        | 0.490                       |

<sup>†</sup> No paired t-test was performed for differences between groups before the start of the study.

SD: Standard Deviation

SNK: Sports Nutrition Knowledge

TSRQ: Treatment Self-Regulation Questionnaire

**Table S3.** Between-group differences in BDHQ.

|                                 | Self-Determination Theory group (n = 14) |          |                   |          |                    |          | Control group (n = 17) |          |                   |          |                    |          | p value† |
|---------------------------------|------------------------------------------|----------|-------------------|----------|--------------------|----------|------------------------|----------|-------------------|----------|--------------------|----------|----------|
|                                 | Before                                   |          | Immediately after |          | After three months |          | Before                 |          | Immediately after |          | After three months |          |          |
|                                 |                                          |          |                   |          |                    |          |                        |          |                   |          |                    |          |          |
|                                 | mean                                     | mean     | mean              | mean     | mean               | mean     | mean                   | mean     |                   |          |                    |          |          |
|                                 | value±SD                                 | value±SD | value±SD          | value±SD | value±SD           | value±SD | value±SD               | value±SD | value±SD          | value±SD | value±SD           | value±SD |          |
| BDHQ (Nutrient intake)          |                                          |          |                   |          |                    |          |                        |          |                   |          |                    |          |          |
| Energy (kcal)                   | 2764±                                    | 912      | 3224±             | 541      | 3295±              | 713      | 3000±                  | 679      | 3118±             | 756      | 3165±              | 919      | 0.416    |
| Protein (g)                     | 83.5±                                    | 32.9     | 95.8±             | 24.8     | 97.6±              | 28.7     | 94.1±                  | 27.2     | 95.9±             | 26.3     | 104.2±             | 34.6     | 0.334    |
| Fat (g)                         | 63.5±                                    | 22.3     | 68.2±             | 20.0     | 69.0±              | 19.8     | 75.5±                  | 21.3     | 76.7±             | 27.6     | 75.5±              | 34.5     | 0.137    |
| Carbohydrate (g)                | 448.5±                                   | 148.8    | 539.8±            | 93.3     | 551.2±             | 118.5    | 468.3±                 | 124.4    | 494.7±            | 117.4    | 499.7±             | 132.4    | 0.690    |
| Calcium (mg)                    | 528.7±                                   | 325.0    | 633.7±            | 251.7    | 601.2±             | 296.5    | 523.6±                 | 161.2    | 659.6±            | 233.0    | 615.8±             | 185.2    | 0.958    |
| Iron (mg)                       | 8.2±                                     | 4.0      | 9.4±              | 2.8      | 9.3±               | 4.1      | 8.5±                   | 2.1      | 9.4±              | 3.3      | 10.1±              | 3.7      | 0.850    |
| Vitamin D (µg)                  | 8.4±                                     | 4.4      | 9.2±              | 6.0      | 10.2±              | 6.1      | 7.5±                   | 5.2      | 8.1±              | 4.7      | 13.3±              | 11.3     | 0.597    |
| Vitamin B <sub>1</sub> (mg)     | 0.9±                                     | 0.4      | 1.1±              | 0.2      | 1.1±               | 0.3      | 1.0±                   | 0.3      | 1.1±              | 0.4      | 1.2±               | 0.4      | 0.455    |
| Vitamin C (mg)                  | 115.9±                                   | 54.8     | 141.7±            | 59.4     | 132.1±             | 74.0     | 102.5±                 | 47.2     | 131.8±            | 79.2     | 131.3±             | 65.4     | 0.469    |
| Dietary fiber (g)               | 12.3±                                    | 5.4      | 13.6±             | 4.1      | 13.8±              | 4.9      | 13.5±                  | 3.7      | 14.4±             | 5.4      | 14.8±              | 5.3      | 0.461    |
| BDHQ (Intake by food group) **  |                                          |          |                   |          |                    |          |                        |          |                   |          |                    |          |          |
| Cereal grains (g)               | 955.3±                                   | 305.6    | 1099.6±           | 245.1    | 1193.5±            | 268.2    | 1020.1±                | 327.9    | 1022.3±           | 207.5    | 1074.9±            | 285.0    | 0.577    |
| Potatoes (g)                    | 25.8±                                    | 25.1     | 26.2±             | 38.8     | 28.9±              | 22.5     | 31.3±                  | 32.8     | 30.8±             | 32.0     | 42.5±              | 42.4     | 0.610    |
| Sugar and sweeteners (g)        | 2.7±                                     | 2.5      | 2.9±              | 2.7      | 3.6±               | 2.1      | 2.5±                   | 2.0      | 2.3±              | 1.6      | 3.4±               | 1.9      | 0.861    |
| Pulses (g)                      | 67.4±                                    | 67.1     | 76.4±             | 72.8     | 53.0±              | 56.9     | 46.6±                  | 34.2     | 62.5±             | 42.5     | 52.5±              | 30.5     | 0.305    |
| Green and yellow vegetables (g) | 126.7±                                   | 70.6     | 159.1±            | 74.2     | 138.0±             | 81.8     | 99.8±                  | 69.2     | 159.9±            | 99.3     | 146.6±             | 83.6     | 0.295    |
| Other vegetables (g)            | 125.0±                                   | 75.8     | 113.5±            | 61.6     | 137.4±             | 75.5     | 174.5±                 | 95.7     | 150.2±            | 106.9    | 163.4±             | 78.2     | 0.127    |
| Fruits (g)                      | 195.2±                                   | 146.1    | 306.0±            | 196.2    | 221.4±             | 147.8    | 133.2±                 | 152.4    | 215.3±            | 208.6    | 180.5±             | 139.9    | 0.261    |
| Fish and shellfish (g)          | 48.0±                                    | 29.5     | 64.7±             | 41.2     | 62.9±              | 44.3     | 37.2±                  | 30.8     | 51.3±             | 38.6     | 71.2±              | 76.2     | 0.330    |
| Meats (g)                       | 104.2±                                   | 46.1     | 111.8±            | 33.4     | 122.2±             | 42.9     | 156.2±                 | 86.9     | 134.5±            | 60.1     | 153.8±             | 87.9     | 0.043 *  |
| Eggs (g)                        | 57.6±                                    | 50.9     | 60.1±             | 53.6     | 62.9±              | 50.7     | 65.8±                  | 36.4     | 65.0±             | 49.3     | 68.2±              | 41.8     | 0.606    |
| Dairy products (g)              | 183.3±                                   | 167.9    | 257.0±            | 147.0    | 219.7±             | 146.4    | 177.3±                 | 93.3     | 262.6±            | 134.4    | 184.8±             | 95.7     | 0.900    |
| Fats and oils (g)               | 16.4±                                    | 4.4      | 15.6±             | 5.5      | 16.8±              | 6.6      | 23.7±                  | 8.3      | 20.7±             | 7.8      | 18.7±              | 12.1     | 0.004 *  |
| Confectioneries(g)              | 11.5±                                    | 11.2     | 7.4±              | 9.5      | 14.0±              | 16.1     | 25.6±                  | 52.5     | 12.8±             | 23.7     | 18.8±              | 22.5     | 0.333    |
| Beverages (g)                   | 445.7±                                   | 289.3    | 656.5±            | 443.9    | 529.1±             | 518.1    | 375.9±                 | 318.7    | 482.4±            | 463.8    | 382.5±             | 351.1    | 0.532    |
| Seasonings and spices (g)       | 174.6±                                   | 147.9    | 298.0±            | 191.4    | 255.6±             | 177.7    | 268.0±                 | 186.7    | 289.7±            | 150.1    | 285.9±             | 239.6    | 0.140    |

\* *p* < 0.05: Significant difference

† No paired t-test was performed for differences between groups before the start of the study.

SD: Standard Deviation

BDHQ: Brief-type self-administered diet history questionnaire

\*\*Foods in each food group

Cereal grains : bread, buckwheat, udon (thick wheat noodles), Chinese noodles, pasta, meshi (cooked rice)

Potatoes : potato(All types) Sugar and sweeteners : sugars, cooking sugar Pulses : tofu, fried tofu, natto

Green and yellow vegetables : broccoli, carrots, pumpkin, tomatoes Other vegetables : lettuce, cabbage, radish, root vegetables

Fruits : oranges, strawberries Fish and shellfish : fish, squid, octopus, shrimp, shell Meats : chicken, pork, beef, ham

Eggs : eggs Dairy products : milk, ice cream Fats and oils : cooking oil

Confectioneries : western confectionery (cake, biscuits, crackers, snacks, chocolate), Japanese confectionery(rice crackers)

Beverages : green tea, black tea, oolong tea, coffee, cola, Japanese sake, beer shochu, whiskey, wine

Seasonings and spices : salt, mayonnaise, soy sauce, miso soup, noodles soup

**Table S4.** Results of between-group and within-group factor analyses of anthropometrics, SNK, and TSRQ.

|                                    | Grouping factor                                      | Within-group factor                     |                                                  |                                                   |                                                              |                                                           |
|------------------------------------|------------------------------------------------------|-----------------------------------------|--------------------------------------------------|---------------------------------------------------|--------------------------------------------------------------|-----------------------------------------------------------|
|                                    | Reciprocal action Group × Time <i>p</i> <sup>†</sup> | Time Main Effects <i>p</i> <sup>†</sup> | Immediately after — Before <i>p</i> <sup>‡</sup> | After three months — Before <i>p</i> <sup>‡</sup> | After three months — Immediately after <i>p</i> <sup>‡</sup> | Multiple comparison test                                  |
| <b>Anthropometric measurements</b> |                                                      |                                         |                                                  |                                                   |                                                              |                                                           |
| Age (y)                            | 0.993                                                | 0.099                                   |                                                  |                                                   |                                                              |                                                           |
| Height (cm)                        | 0.367                                                | 0.585                                   |                                                  |                                                   |                                                              |                                                           |
| Weight (kg)                        | 0.296                                                | 0.206                                   |                                                  |                                                   |                                                              |                                                           |
| Body fat (%)                       | 0.571                                                | 0.323                                   |                                                  |                                                   |                                                              |                                                           |
| Lean body mass (kg)                | 0.253                                                | 0.154                                   |                                                  |                                                   |                                                              |                                                           |
| Lean body mass/m (kg)              | 0.250                                                | 0.151                                   |                                                  |                                                   |                                                              |                                                           |
| <b>SNK</b>                         |                                                      |                                         |                                                  |                                                   |                                                              |                                                           |
| Total SNK score                    | 0.510                                                | 0.004*                                  | 0.003*                                           | 0.078                                             | 1.000                                                        | Before < Immediately after                                |
| Energy and refueling               | 0.711                                                | 0.122                                   |                                                  |                                                   |                                                              |                                                           |
| Hydration                          | 0.183                                                | 0.183                                   |                                                  |                                                   |                                                              |                                                           |
| Supplements                        | 0.884                                                | 0.698                                   |                                                  |                                                   |                                                              |                                                           |
| Protein                            | 0.200                                                | < 0.001*                                | 0.002*                                           | 0.002*                                            | 1.000                                                        | Before < Immediately after<br>Before < After three months |
| <b>TSRQ</b>                        |                                                      |                                         |                                                  |                                                   |                                                              |                                                           |
| Autonomous motivation subscale     | 0.571                                                | 0.077                                   |                                                  |                                                   |                                                              |                                                           |
| Externally controlled motivation   | 0.313                                                | 0.058                                   |                                                  |                                                   |                                                              |                                                           |
| Nonmotivation subscale             | 0.311                                                | 0.378                                   |                                                  |                                                   |                                                              |                                                           |
| Relative Autonomous Motivation     | 0.095                                                | 0.057                                   |                                                  |                                                   |                                                              |                                                           |

\* *p* < 0.05: Significant difference  
† A two-way ANOVA was conducted on the between-group and within-group factors.  
‡ Multiple comparison tests using the Bonferroni method were performed for before, after, after three months for within-group factors.  
< less than, > more than  
SNK: Sports Nutrition Knowledge  
TSRQ: Treatment Self-Regulation Questionnaire
